# Supplementary material for: A self-healable and tough nanocomposite hydrogel crosslinked by novel ultrasmall aluminum hydroxide nanoparticles
Source: Royal Society of Chemistry journal article supplement (doi:10.1039/c7nr04722c), 2017-01-01
Supplement: c7nr04722c1.pdf [file c7nr04722c1.pdf]

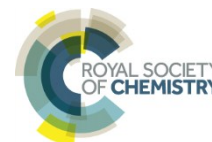

Journal Name

ARTICLE

## Supporting information for publication

### Self-healable and tough nanocomposite hydrogel crosslinked by novel ultrasmall aluminum hydroxide nanoparticles

Haoyang Jiang, Gongzheng Zhang, Feibo Li, Yaqian Zhang, Yu lei, Yanhong Xia, Xianghu Jin, Xianqi Feng and Huanjun Li\*  
School of Chemistry and Chemical Engineering, Beijing Institute of Technology, Beijing 100081, P. R. China  
E-mail: lihj@bit.edu.cn.  
Tel: +86-10-68918530

Tab. S1 Compositions of the initial pre-gel solutions for Al-NC gels.

| Hydrogels | AMPS/g | AAM/g | Al(OH) <sub>3</sub> /g <sup>a)</sup> | H <sub>2</sub> O /g | IR2959 <sup>b)</sup><br>/mg |
|-----------|--------|-------|--------------------------------------|---------------------|-----------------------------|
| AM80-Al3  | 1.66   | 2.28  | 0.29                                 | 8                   | 30                          |
| AM80-Al6  | 1.66   | 2.28  | 0.57                                 | 8                   | 30                          |
| AM80-Al9  | 1.66   | 2.28  | 0.86                                 | 8                   | 30                          |
| AM80-Al12 | 1.66   | 2.28  | 1.14                                 | 8                   | 30                          |
| AM70-Al6  | 2.49   | 2.00  | 0.57                                 | 8                   | 30                          |
| AM90-Al6  | 0.83   | 2.57  | 0.57                                 | 8                   | 30                          |

a) The concentration of the prepared AH NPs sol is 17 wt%. b) IR2959 is 2-hydroxy-4'-(2-hydroxyethoxy)-2-methyl-propiopehe.

Tab. S2 Mechanical properties of original and self-healed Al-NC gels  
with different AH NPs content and AAM molar ratio

| Sample    | Original Tensile<br>Stress (KPa) | Original fracture<br>energy (KJ/m <sup>3</sup> ) | Self-healed Tensile<br>Stress (kPa) | Self-healed fracture<br>energy(KJ/m <sup>3</sup> ) |
|-----------|----------------------------------|--------------------------------------------------|-------------------------------------|----------------------------------------------------|
| AM80-Al3  | 138.8                            | 186.1                                            | 67.1                                | 72.3                                               |
| AM80-Al6  | 282.7                            | 124.8                                            | 244.3                               | 109.2                                              |
| AM80-Al9  | 332.4                            | 96.3                                             | 142.5                               | 30.8                                               |
| AM80-Al12 | 510.7                            | 125.0                                            | 144.2                               | 31.7                                               |
| AM70-Al6  | 154.3                            | 83.5                                             | 99.0                                | 63.9                                               |
| AM90-Al6  | 359.9                            | 129.6                                            | 254.9                               | 100.9                                              |

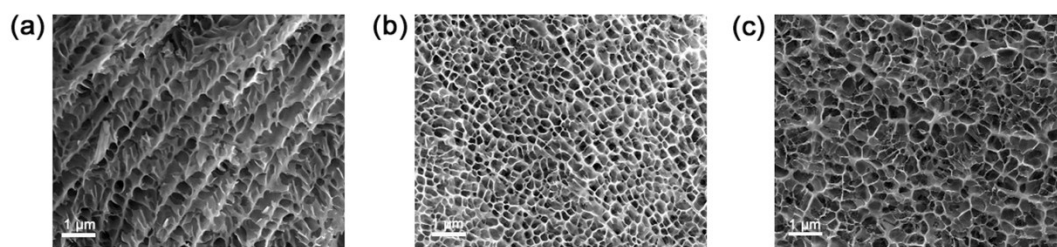

Fig. S1 SEM images of Al-NC gels with different molar ratio of AAm of (a) 70 mol%, (b) 80 mol%, (c) 90 mol%, at the fixed 9 wt% AH NPs.

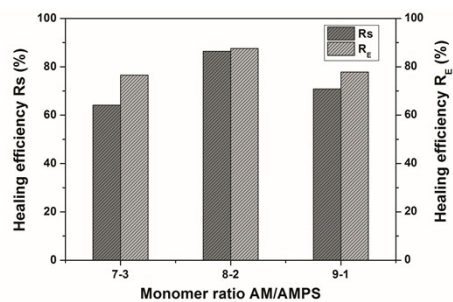

Fig. S2 The self-healing efficiency of the healed Al-NC gels with various AAm molar ratio (70 mol%, 80 mol% and 90 mol%) at fixed AH NPs content of 6 wt%.
